# Supplementary material
Source: PubMed Central journal article supplement (PMC6511285)

1 **Treatment of Severe Persistent Asthma with IL-6 Receptor blockade**

2

3 Brittany Esty, MD, MPH<sup>a\*</sup>, Hani Harb, PhD<sup>a\*</sup>, Lisa M. Bartnikas, MD<sup>a</sup>, Louis M. Charbonnier,  
4 PhD<sup>a</sup>, Amir H. Massoud, PhD<sup>a</sup>, Carmen Leon-Astudillo, MD<sup>b</sup>, Gary Visner, DO<sup>b</sup>, Meera  
5 Subramaniam, MD<sup>b</sup>, Wanda Phipatanakul, MD, MS<sup>a</sup>, Talal A. Chatila, MD, MSc<sup>a</sup>

6

7 <sup>a</sup> Division of Immunology, Boston Children's Hospital, Department of Pediatrics, Harvard  
8 Medical School, Boston, MA. <sup>b</sup> Division of Respiratory Diseases, Boston Children's Hospital,  
9 Department of Pediatrics, Harvard Medical School, Boston, MA.

10 \* Authors contributed equally to the study

11

12 **Corresponding Author:** Talal A. Chatila, MD, MSc, Division of Immunology, Department of  
13 Pediatrics, Boston Children's Hospital, Harvard Medical School, Boston, MA 02115. E-mail:  
14 talal.chatila@childrens.harvard.edu.

## 15 SUPPLEMENTARY METHODS

16 **Study approval.** Studies on patient peripheral blood samples were all performed at the Boston  
17 Children's Hospital and were approved by the Institutional Review Board.

18 **Antibodies:** Flow cytometry and intracellular staining. Single-cell suspensions were stained with  
19 the indicated antibodies (Ab) and analyzed on LSRIIFortessa cytometer (Becton Dickinson).  
20 Cytokine expression in CD4<sup>+</sup> T cells was determined by stimulating cells with PMA (20 ng/ml)  
21 plus ionomycin (1 µg/ml) for 4 hours in the presence of Golgi-plug (BD Biosciences) followed  
22 by intracellular staining for the respective cytokine using the eBioscience  
23 Fixation/Permeabilization buffer following the manufacturer's instructions. Fluorescence-  
24 conjugated mAbs used were obtained from BD Biosciences, Biolegend and eBioscience. Anti-  
25 CD3-APC-Cy7, (H1T3a), anti-CD4-PerCP-Cy5.5 and PE (PRA-T4), anti-CD25-PE (CD25-  
26 4E3), anti-CD127-PE-Cy7 (A019D5), anti-CRTH2-FITC (BM16), anti-CXCR3-APC (G025H7),  
27 anti-CCR4-BV605 (L29H14), anti-CCR6-Amcyan (G034E3). For intracellular staining, the  
28 following mAbs were used from BD Biosciences, Biolegend and eBioscience, anti-IFNG-PE-  
29 Cy7 (45.B3) anti-IL-13-PerCP-Cy5.5 (JE510-SA2), Anti-IL-4-BV605 (MP4-25D2), anti-IL-17-  
30 APC (BL168), anti-FOXP3-Pacific Blue (PCH101).

31 **Cell preparation:** Blood was obtained from the patients after a written consent. PBMCs were  
32 isolated using Ficoll (GE-Healthsciences). Shortly, 4 mL of Ficoll were layered in a 15 mL tube.  
33 Afterwards, the blood will be layered on top of ficoll very slowly to build two separate phases.  
34 The ficoll/blood mixture were centrifuged on 300 g for 20 min without breaks to have the  
35 PBMCs caught in the middle layer. The cells were aspirated into a new 15 mL tube and washed

36 twice with 10 mL PBS. The cell pellet was then used for the PMA/Ionomycin/ Golgi-plug  
37 stimulation and FACs staining.

38 **Data analysis:** The flowcytometric analysis of the data was done using Flowjo software  
39 (FlowJo, LLC). The graphs and statistical analysis were done using GraphPad Prism version 7.00  
40 for Windows, GraphPad Software, La Jolla California USA ([www.graphpad.com](http://www.graphpad.com)). The time  
41 course of cytokine expression post-therapy was analyzed by two-way ANOVA with Tukey post-  
42 test analysis. Within each cell type and for each cytokine, the values obtained post therapy were  
43 compared to the pre-therapy baseline value. A p value <0.05 was considered statistically  
44 significant.

45 Statistical process control (SPC) charts were created to demonstrate days between  
46 admissions for patient 1 and 2. SPC charts demonstrate data over time illustrating common  
47 cause and special cause variation. A t-chart is a measure of time between disease incidences for  
48 a specified period of time <sup>1</sup>. Common cause variation demonstrates randomly distributed  
49 variation around the center line appearing between upper and lower control limits <sup>2</sup>. Common  
50 cause variation represents variation inherent in the process. Control limits are positioned 3  
51 standard deviations from the center line (3 sigma limits) <sup>1</sup>. Special cause variation demonstrates  
52 non-random variation. Identification of non-random variation is defined by rules of statistical  
53 process control. The Western Electric rules for special cause variation include: 1) One or more  
54 points beyond a 3-sigma limit, 2) Two out of three successive points beyond a 2-sigma limit, 3)  
55 Four out of five successive points beyond a 1-sigma limit, and 4) Eight consecutive points above  
56 or below the center line <sup>3</sup>. SPC t-charts were created for the days between admissions in QI  
57 Macros, SPC Software for Excel (<https://www.qimacros.com>) to analyze measures.

58

59   References

- 60       1. Provost L, Murray S. The Health Care Data Guide: Learning from Data for Improvement.  
61       Hoboken, NJ: John Wiley & Sons, 2011:229e30.
- 62       2. Montgomery DC. Introduction to statistical quality control. 6. USA: Wiley; 2009. P 182-  
63       190.
- 64       3. Western Electric Company. Statistical quality control handbook. 2nd Easton: Mack  
65       Printing Company; 1958. Available from: [http://www.westernelectric.com/support-](http://www.westernelectric.com/support-statistical-quality-control-handbook.html)  
66       [statistical-quality-control-handbook.html](http://www.westernelectric.com/support-statistical-quality-control-handbook.html). Accessed 14 Feb 2019.

67

68 **Supplemental Figure Legend**

69 **Fig. E1.** Statistical process control (SPC) t chart illustrating days between inpatient hospital  
70 admissions in patient 1 (Fig E1, A) and patient 2 (Fig E1, B). Note. Red points indicate special  
71 cause variation.

72

73 **Fig. E2.** Analysis of cytokine production by T effector (Teff) cells in patient 1 and 2. **A and B,**  
74 Flow cytometric analysis of IL-4 and IL-17 expression in Teff cells at baseline and at 4, 8 and 10  
75 months after tocilizumab treatment in patient 1 (Fig E2, A) patient 2 (Fig E2, B).

76

77 **Fig. E3.** Peripheral blood eosinophil count at baseline and with each tocilizumab infusion in  
78 patient 1 (Fig E3, A) patient 2 (Fig E3, B).

A

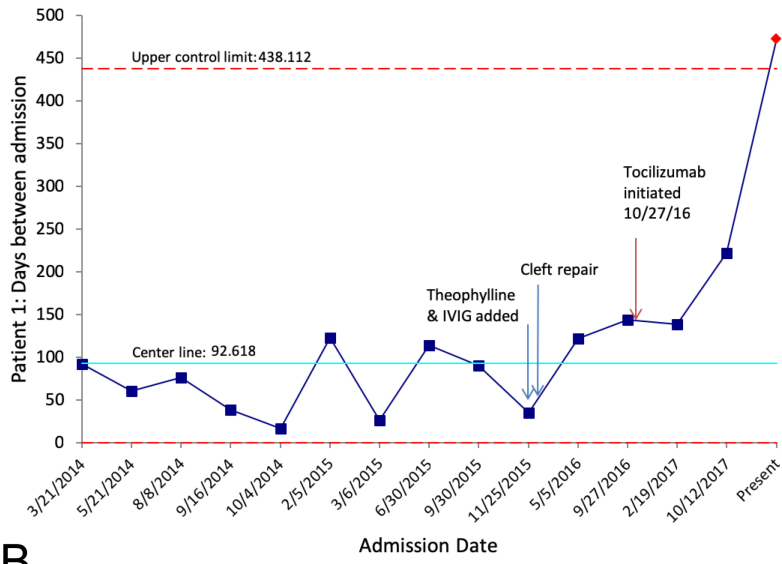

B

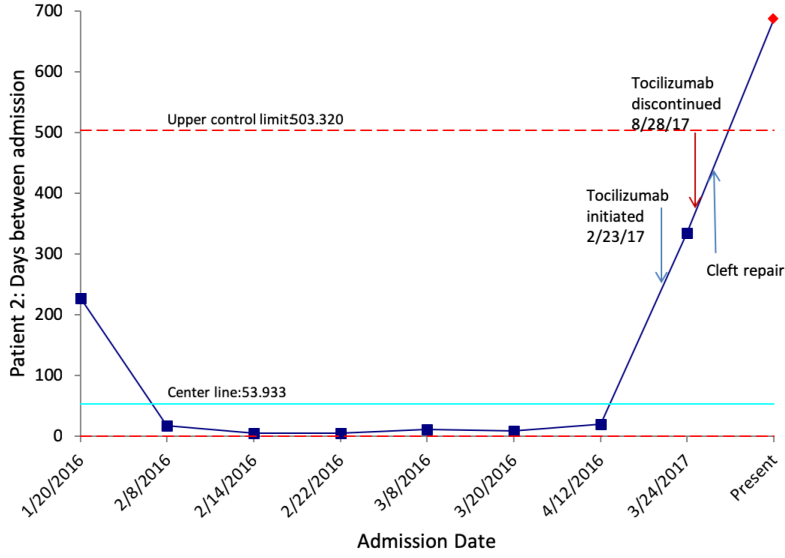

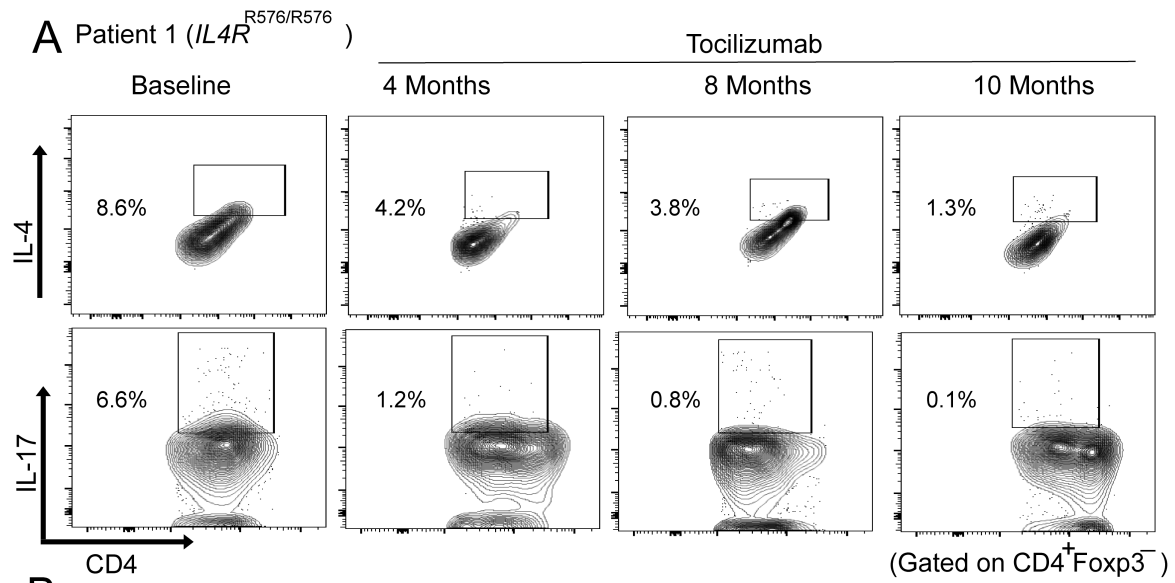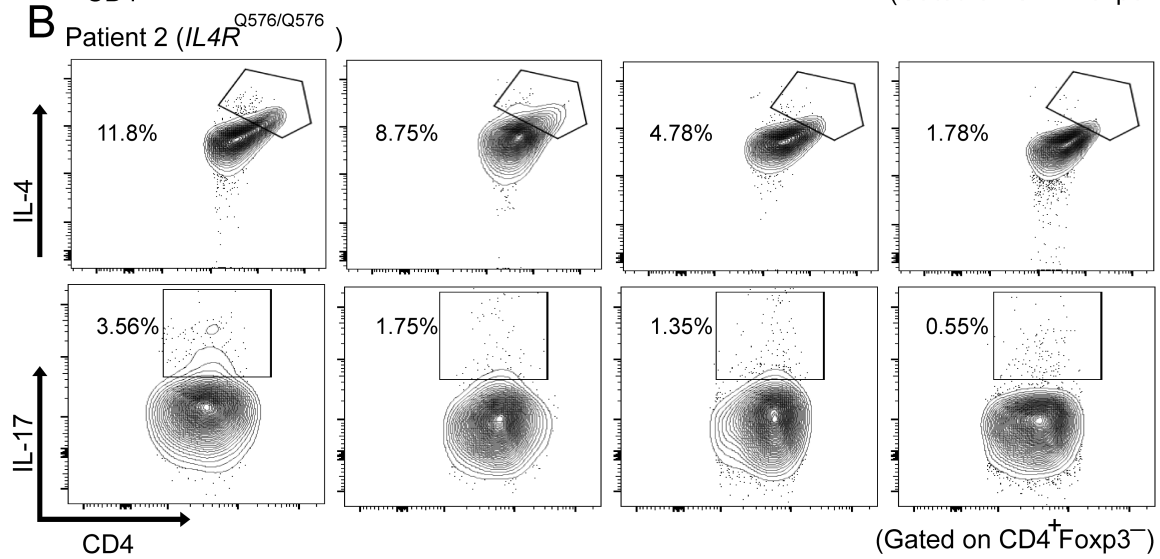

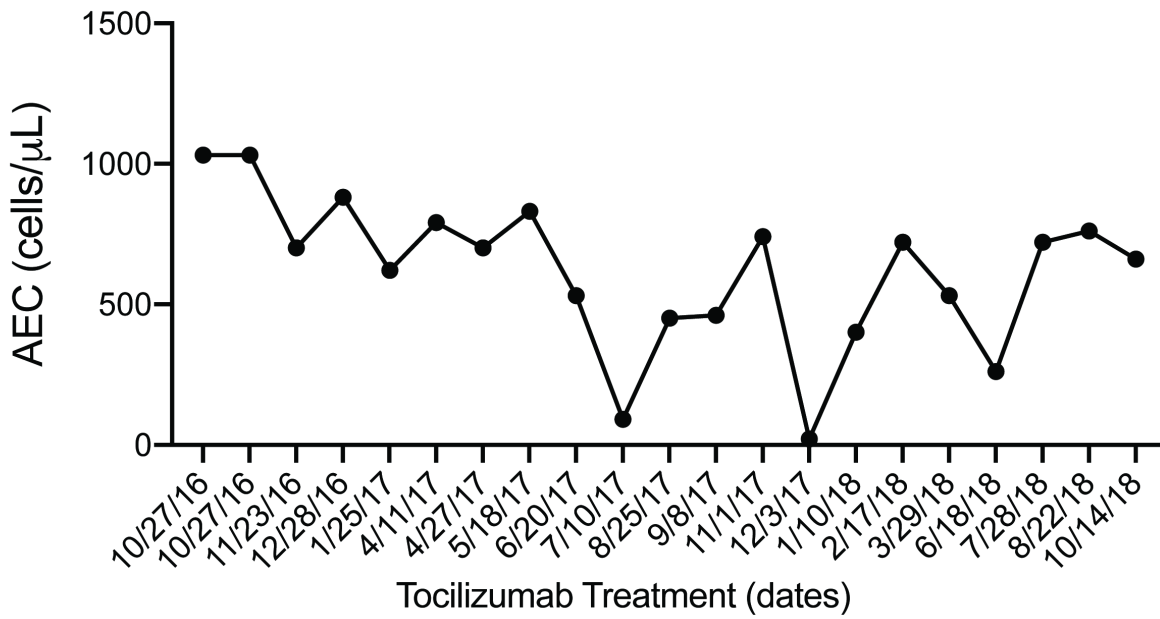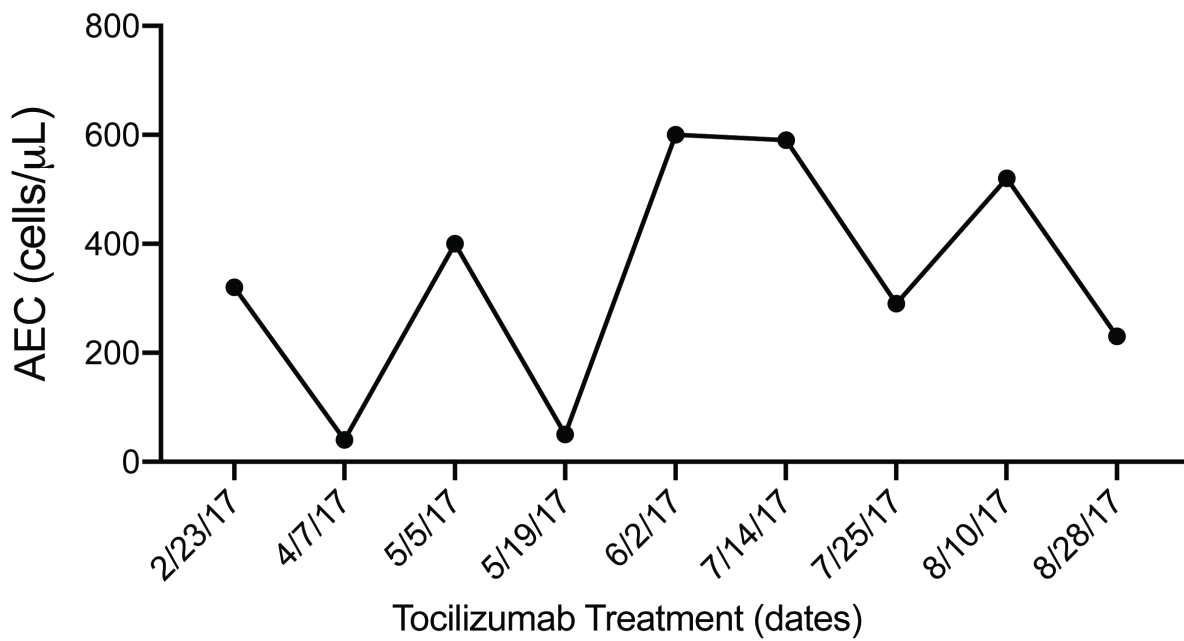

Supplement: NIHMS1524112-supplement-1.pdf [file NIHMS1524112-supplement-1.pdf]
